## CASE REPORTS

## Malignant hyperthermia in infancy and identification of novel RYR1 mutation

D. Chamley, N. A. Pollock<sup>1\*</sup>, K. M. Stowell<sup>2</sup> and R. L. Brown<sup>2</sup>

Department of Anaesthesia, Middlemore Hospital, Auckland, New Zealand. <sup>1</sup>Department of Anaesthesia, Palmerston North Hospital, Palmerston North, New Zealand. <sup>2</sup>Institute of Molecular BioSciences, Massey University, Palmerston North, New Zealand

\*Corresponding author

Malignant hyperthermia (MH) has been reported as non-existent in children less than 1 yr old, although several unconfirmed reports have been published. A case report of MH in a 6-month-old child is presented, with confirmation of MH susceptibility by *in vitro* contracture testing of quadriceps muscle at 13 yr old. Genetic analysis revealed a novel RYR1 mutation that substitutes arginine 2452 for tryptophan in a region of the calcium channel mutated in several other MH pedigrees.

Br J Anaesth 2000; 84: 500–4

**Keywords:** genetic factors, hyperthermia; metabolism, hyperthermia

Accepted for publication: November 8, 1999

Malignant hyperthermia (MH) is an inherited hypermetabolic disorder of skeletal muscle triggered by depolarizing muscle relaxants and potent inhalation anaesthetic agents. The incidence has recently been reported as 1:50 000 anaesthetics administered in adults and 1:15 000 in children.<sup>1</sup> MH in infancy is considered rare<sup>2</sup> or even non-existent.<sup>3</sup> There have been several reports indicating MH reactions in infants<sup>4–8</sup> (Allen, personal communication), but confirmation by *in vitro* contracture testing (IVCT) was not demonstrated in the proband or in immediate relatives. A case report of an MH reaction in a 6-month-old child is presented, and also evidence of a novel RYR1 mutation associated with MH in this family.

### Case report

A 6-month-old male born at term (in 1984) following an uneventful pregnancy presented for repair of complete cleft of the right primary and secondary palate, and incomplete cleft of the left primary palate. A first stage repair using a modified Manchester technique was planned. There was no family or medical history of note, he weighed 7.4 kg and physical examination was normal, other than his congenital cleft palate.

He was premedicated with atropine 0.2 mg and droperidol 1 mg orally 90 min before induction. An uneventful gaseous induction of anaesthesia was carried out using halothane,

and the trachea was intubated with a size 4.0 Oxford tube. The child breathed spontaneously a mixture of halothane, oxygen and nitrous oxide through a humidified T piece circuit, and was monitored using an ECG, digital plethysmograph, precordial stethoscope and rectal temperature probe (capnography, agent analysis and pulse oximetry were not in general use at this time). Fluids were given through a 24-gauge cannula in the foot, and the patient was well draped to prevent heat loss.

Anaesthesia was uneventful for the first 90 min with a heart rate (HR) of between 155 and 165, temperature increasing from the initial recording of 36.4°C to 37.3°C. Over the following 20 min his temperature increased to 38.5°C. During this time malignant hyperthermia was considered, but the diagnosis initially rejected as it was not known to occur in this age group. During the last 10 min of the case (110–120 min from the start) HR increased from 160 to 190, and his temperature continued to increase, reaching 39°C. At the end of the procedure (120 min from the start) the surgeon noted unexpected masseter muscle rigidity when removing the mouth gag, and on removing the drapes the patient was noted to be very flushed and sweaty. Anaesthetic agents were discontinued, respiration was thought to be adequate, the trachea was extubated and the child taken to recovery where his temperature was found to be 39.5°C. Tachypnoea was then noted, blood-gas analysis showed a pH of 7.195,  $P_{CO_2}$  3.8 kPa,  $P_{O_2}$  13.4 kPa

with a base deficit of 13.4 mmol litre<sup>-1</sup> and a diagnosis of malignant hyperthermia was made. Dantrolene 15 mg (2 mg kg<sup>-1</sup>) was administered, cooling was commenced using a fan over a wet sheet, and an arterial line and urinary catheter inserted. Sodium bicarbonate, 7.5 mmol was given. Serum potassium was measured at 5.6 mmol litre<sup>-1</sup>. The maximum temperature reached was 39.5°C 20 min after diagnosis, and 140 min following induction. The temperature returned to normal 80 min after diagnosis, 200 min from the start. No myoglobin was present in the urine and creatine kinase (CK) was initially 290 i.u., rising to 1845 i.u. (normal 0–300 i.u.) 2 h post-anaesthetic. No further therapy was required and an uneventful recovery followed.

Investigation of the family at the time using CK showed his mother to have an elevated level of 623 i.u., while father's and siblings' CK were normal. The CK of the patient measured several months after the reaction was 243 i.u.

At 13 yr old the patient underwent lateral quadriceps muscle biopsy. The test was performed in accordance with the European MH Group protocol.<sup>9</sup> This demonstrated a strongly positive contracture (MHS) to both halothane and caffeine (6.4 g tension to 2% halothane and 5.1 g tension to caffeine 2 mmol litre<sup>-1</sup> –  $n < 0.2$  g tension). The mother of the patient had a 4.3 g response to 2% halothane and a 3.7 g response to caffeine 2 mmol litre<sup>-1</sup>, and was also diagnosed MHS. Histology of the muscle was normal. There was no evidence of myositis or recognizable dystrophy.

The proband was screened for published MH RYR1 mutations in the central mutation region of the ryanodine receptor (RYR1) gene by PCR-amplification of cDNA and automatic sequencing. None of the nine published mutations<sup>10–15</sup> in this region was detected. However, a novel C7354T nucleotide transition that substitutes arginine 2452 for tryptophan was identified. The mother of the proband was also positive for the Arg2452Trp mutation. The mutation was present in the DNA of one of two siblings examined, but these individuals are yet to be examined by IVCT. Segregation of the Arg2452Trp mutation in this small family (family 1) is shown in Figure 1A.

The method of 'single stranded conformational polymorphism analysis' (SSCP)<sup>16</sup> was used to screen for the Arg2452Trp mutation in exon 46 amplified from genomic DNA (Fig. 2). The mutation was not found in 100 normal chromosomes indicating that it is not likely to be a common polymorphism. DNA samples from MHS probands from other NZ MH families were also screened for the mutation by SSCP analysis

The Arg2452Trp mutation was not detected in the DNA from 33 MHS probands examined. However, a new conformational variant was detected in exon 46 in one unrelated MHS patient as shown in Fig. 2. Sequence analysis of this second variant revealed a G7361A mutation that changes arginine 2454 to histidine. This second mutation was identified in an unrelated young male who developed a fulminant MH reaction with masseter muscle spasm, significant hypercapnia, tachycardia and rhabdomyolysis

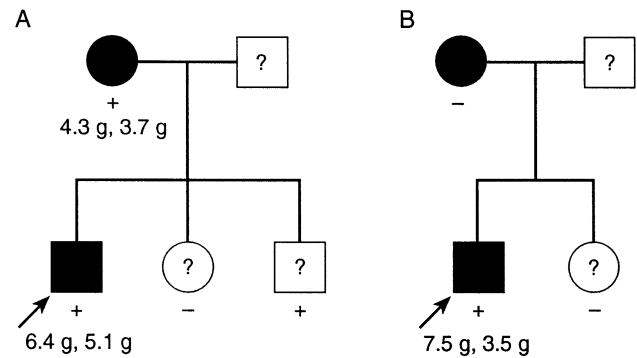

**Fig 1** (A) Segregation of the Arg2452Trp mutation in family 1. The presence (+) or absence (–) of the mutant allele is indicated. The proband suffered a MH crisis in infancy and is indicated by an arrow. Filled symbols represent MHS subjects diagnosed by IVCT. IVCT contracture responses (g) of MHS muscle to 2% halothane and caffeine 2 mM, respectively, are shown. (B) Detection of the Arg2454His mutation in a single individual from family 2. Symbols are as described for (A).

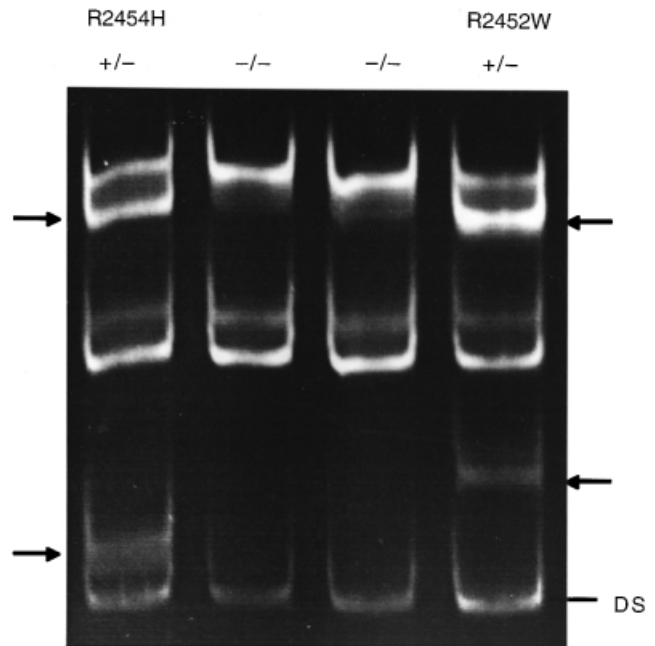

**Fig 2** Detection of the R2454H (lane 1) and R2452W (lane 4) mutations in DNA of MH probands by SSCP. Mutations are revealed by the differential mobility of single stranded DNA on 8% non-denaturing polyacrylamide gels, stained with ethidium bromide. Arrows mark mutation-specific SSCP bands that are absent from normal controls (lanes 2 and 3). DS, double-stranded DNA.

during an emergency orthopaedic procedure. IVCT was strongly positive. The mother of this patient had a normal IVCT (MHN), and both mother and sister were negative with respect to the mutation. The results of a screen for the Arg2454Trp mutation in members of family 2 are presented in Figure 1B.

## Discussion

Pyrexia, increasing tachycardia, rigidity, tachypnoea, and significant metabolic acidosis as well as flushing and

sweating provided clinical evidence for MH in this child. The MH clinical grading scale<sup>17</sup> ranks the likelihood that an adverse anaesthetic event represents MH. Points are assigned to abnormal signs and laboratory findings (clinical indicators), the points are then summed to produce a raw score which is translated to a qualitative MH rank indicating with which likelihood MH could occur – from 1 (almost never) to 6 (almost certain). This infant ranked 6 on this clinical grading scale. Confirmation of an MH reaction was demonstrated by positive IVCT, the only reliable screening test for MH susceptibility.<sup>18</sup>

Jaw rigidity was first noted by the surgeon. The anaesthetist at the time (DC) was not aware of rigidity in other muscle groups. In the course of an MH reaction rigidity of the jaw usually presents as masseter muscle spasm at induction of anaesthesia following the use of suxamethonium. In patients not given suxamethonium, muscles of the chest, abdomen and extremities may be involved initially, although eventually rigidity may be generalized.<sup>19</sup> Isolated jaw rigidity in the absence of suxamethonium, 120 min after induction, may represent an alternative presentation of MH in an infant.

Management of the reaction proceeded with few problems. Dantrolene was administered in a dose of 2 mg kg<sup>-1</sup> which is lower than the recommended starting dose of 2.4 mg kg<sup>-1</sup>.<sup>20</sup> Lerman found normal metabolism of dantrolene in young children and a dose of 2.4 mg kg<sup>-1</sup> produces safe and predictable blood concentrations. Reconstituted dantrolene, pH 9–10, is irritant to veins and in an infant should be injected into a fast-running intravenous infusion or large central vein.<sup>21</sup> Intraosseous administration provides an alternative route if venous access is problematic.

Reactions in infants younger than 6 months have not been previously proven. There have been several reports of MH reactions in the newborn associated with the stress of labour, but alternative aetiologies for these reactions could be proposed.<sup>21–23</sup> At our institution MH suspect newborn are monitored for 4 h with pulse, ventilatory frequency and temperature, and no significant abnormalities have been reported in 66 infants born to MHS or mothers related to MHS individuals (Langton, unpublished observations). Reactions associated with farrowing have not been reported in susceptible piglets. There may in fact be resistance to the development of MH in the neonatal period and early infancy. Fay and Gallant<sup>24</sup> found that MHS piglets had delayed reactions when exposed to triggering agents, and *in vitro* responses were not as pronounced as the contractures usually observed in muscle from older MHS pigs. These findings were confirmed by Wedel.<sup>2</sup>

As indicated earlier, several case reports in infants younger than 6 months have been published in the anaesthetic literature, but with the exception of Faust and co-workers,<sup>25</sup> IVCT was not performed. In this latter case triggering agents were not administered, the reaction ranked 3 or 'somewhat less than likely' on the MH clinical grading scale and IVCT was performed from sterno-mastoid muscle

and not quadriceps, and therefore the diagnosis could be questioned.

IVCT in this case was undertaken in early teenage years, and in general we follow the policy of Ellis and co-workers<sup>9</sup> who established a lower age limit of 10 yr due to inconsistency in muscle responses in young children, possibly related to immature muscle tissue. The size of the muscle sample to be removed and scarring are other considerations. However, Gronert<sup>26</sup> has found normal contracture responses in small numbers of children and other units will test younger children.<sup>27</sup> If the proband is less than 10 yr old, some units will test the parents and if they are normal the child is considered normal.<sup>9, 28</sup> However, in our unit there has been parental resistance to this procedure and a reaction could also result from a *de novo* mutation in the proband.

The primary event triggering MH is the abnormal release of calcium from the sarcoplasmic reticulum (SR) that initiates sustained contractile and metabolic activity in skeletal muscle.<sup>29</sup> The SR calcium release channel was identified as the ryanodine receptor, a large tetramer, observed as the 'foot' structure spanning the junctional SR and surface membranes.<sup>30</sup> Abnormalities in the regulation of calcium release from the ryanodine receptor were revealed in studies of skeletal muscle from MHS pigs and humans.<sup>31</sup> In 1990, McCarthy and co-workers<sup>32</sup> identified the ryanodine receptor gene (RYR1) as a likely candidate for the MHS locus, and in the subsequent 9 yr the role of RYR1 has been confirmed with the discovery of numerous RYR1 mutations in MH families.<sup>13</sup> The Arg2452Trp mutation described in this report takes the number of published MH/central core disease mutations in the RYR1 gene to 20. RYR1 mutations may underlie only 50% of cases of MH susceptibility,<sup>33</sup> and defects in any number of proteins involved in myoplasmic calcium homeostasis may be commonly expressed as the MH syndrome. In fact, genetic heterogeneity in MH is now firmly established with the description of five additional MH loci on chromosomes 17q, 7q, 3q, 1q and 5p.<sup>34–38</sup> The emerging complexity of MH genetics excludes the development of a general genetic test to replace the IVCT in the near future. There are several reports of MHS diagnoses in individuals who are negative for a particular mutation segregating in their family<sup>11, 39–41</sup> suggestive of either false positive IVCT or the occurrence of additional MH genes. Consequently, genetic testing cannot safely replace the IVCT to establish MHN status.

We have searched for the published mutations in the central RYR1 region by automatic sequencing of complementary DNA (cDNA), using skeletal muscle tissue excised for IVCT. RNA was extracted from frozen muscle tissue and used as a template to synthesize the cDNA. Because the cDNA comprises only the coding region of a gene, this approach allows efficient simultaneous screening for clustered RYR1 mutations, as well as enabling detection of any novel mutations. A novel arginine 2452 to tryptophan RYR1 mutation was identified in this patient. The mutation

was also detected in the proband's mother, who tested MHS, and a sibling who is still too young to undergo IVCT examination. The MH status of the father has not yet been examined by IVCT. An investigation of the co-segregation of the mutation with the MH disorder was restricted by the small number of patients investigated by IVCT in this family. Therefore, it is possible that the mutation represents a polymorphism that is not causative of MH. However, the mutation is highly unlikely to be a coincidental polymorphism as it was not detected in the normal population.

While screening the DNA of unrelated MHS probands for the novel Arg2452Trp mutation, a second mutation that changes arginine 2454 to histidine was found in an unrelated adult MHS proband. The Arg2454His substitution identified in this second proband (family 2) occurs only 2 amino acids downstream of the Arg2452Trp mutation that was identified in the first proband (family 1). The Arg2454His mutation was recently described in an Italian family.<sup>15</sup> The independent identification of the same mutation in an unrelated NZ proband supports a causative role for the Arg2454His substitution in MH.

The two arginine substitutions detected in this study (Arg2452Trp and Arg2454His) occur in close proximity to two previously described MH mutations at the arginine 2458 residue.<sup>14</sup> The clustering of four MH mutations within a 7 amino acid region, and the conservation of the three affected arginine residues across species in all RYR1, RYR2 and RYR3 sequences<sup>14 15</sup> implies a critical regulatory role for the positively charged amino acids in this domain of the ryanodine receptor. Interestingly, nine out of 11 mutations reported in the central region of the ryanodine receptor involve arginine residues.

## Acknowledgements

We thank Ms Danielle James for technical assistance. The genetic analysis was supported in part by grants from the New Zealand Lotteries Grants Board, The Palmerston North Medical Research Foundation, and the Australian and New Zealand College of Anaesthetists.

## References

- 1 Abraham RB, Adnet P, Glauber V, Perel A. Malignant hyperthermia. *Postgrad Med J* 1998; **74**: 11–7
- 2 Wedel DJ. The effect of age on the development of MH in susceptible piglets. *Anesthesiology* 1994; **81**: A426
- 3 Bennett EJ, Bowyer DE. Thomas CC, ed. *Principles of Paediatric Anaesthesia*. Illinois: Springfield, 1982; 66–71
- 4 Wiswell TE, Bent RC, Solenberger R. Malignant hyperthermia in infancy. *South Med J* 1989; **82**: 1451–2
- 5 Bailey AG, Bloch EC. Malignant hyperthermia in a three-month-old American Indian infant. *Anesth Analg* 1987; **66**: 1043–5
- 6 Wilhoit RD, Brown Jr RE, Bauman LA. Possible malignant hyperthermia in a 7-week-old infant [see comments]. *Anesth Analg* 1989; **68**: 688–91
- 7 Pennington GP, Joeris L. Malignant hyperthermia in a 3-month-old infant: a case report. *J Med Assoc Ga* 1996; **85**: 162–3
- 8 Meluch AM, Sibert KS, Bloch EC. Malignant hyperthermia following isoflurane anesthesia in an American Lumbee Indian. *N C Med J* 1989; **50**: 485–7
- 9 Ellis FR, Halsall PJ, Harriman DG. The work of the Leeds Malignant Hyperpyrexia Unit, 1971–84. *Anaesthesia* 1986; **41**: 809–15
- 10 Zhang Y, Chen HS, Khanna VK, De Leon S, Phillips MS, Schappert K, et al. A mutation in the human ryanodine receptor gene associated with central core disease. *Nature Genet* 1993; **5**: 46–50
- 11 Phillips MS, Khanna VK, De Leon S, Frodis W, Britt BA, MacLennan DH. The substitution of Arg for Gly2433 in the human skeletal muscle ryanodine receptor is associated with malignant hyperthermia. *Hum Mol Genet* 1994; **3**: 2181–6
- 12 Keating KE, Quane KA, Manning BM, Lehane M, Hartung E, Censier K, et al. Detection of a novel RYR1 mutation in four malignant hyperthermia pedigrees. *Hum Mol Genet* 1994; **3**: 1855–8
- 13 Manning BM, Quane KA, Ording H, Urwyler A, Tegazzin V, Lehane M, et al. Identification of novel mutations in the ryanodine-receptor gene (RYR1) in malignant hyperthermia: genotype-phenotype correlation. *Am J Hum Genet* 1998; **62**: 599–609
- 14 Manning BM, Quane KA, Lynch PJ, Urwyler A, Tegazzin V, Krivosic-Horber R, et al. Novel mutations at a CpG dinucleotide in the ryanodine receptor in malignant hyperthermia. *Hum Mutat* 1998; **11**: 45–50
- 15 Barone V, Massa O, Intravaia E, Bracco A, Di Martino A, Tegazzin V, et al. Mutation screening of the RYR1 gene and identification of two novel mutations in Italian malignant hyperthermia families. *J Med Genet* 1999; **36**: 115–8
- 16 Hongyo T, Buzard GS, Calvert RJ, Weghorst CM. 'Cold SSCP': a simple, rapid and non-radioactive method for optimized single-strand conformation polymorphism analyses. *Nucleic Acids Res* 1993; **21**: 3637–42
- 17 Larach MG, Localio AR, Allen GC, Denborough MA, Ellis FR, Gronert GA, et al. A clinical grading scale to predict malignant hyperthermia susceptibility. *Anesthesiology* 1994; **80**: 771–9
- 18 Ellis FR. Malignant hyperthermia: how important after 30 years. *Acta Anaesthesiol Belg* 1990; **41**: 61–3
- 19 Britt BA. The clinical aspects of malignant hyperthermia. In: Nalda Felipe MA, Gottman S, Khambatta HJ, eds. *Malignant Hyperthermia Current Concepts*. Bad Homburg: Normed, 1988
- 20 Lerman J, McLeod ME, Strong HA. Pharmacokinetics of intravenous dantrolene in children. *Anesthesiology* 1989; **70**: 625–9
- 21 Ward A, Chaffman MO, Sorkin EM. Dantrolene. A review of its pharmacodynamic and pharmacokinetic properties and therapeutic use in malignant hyperthermia, the neuroleptic malignant syndrome and an update of its use in muscle spasticity. *Drugs* 1986; **32**: 130–68
- 22 Sewall K, Flowerdew RM, Bromberger P. Severe muscular rigidity at birth: malignant hyperthermia syndrome? *Can Anaesth Soc J* 1980; **27**: 279–82
- 23 Cupryn JP, Kennedy A, Byrick RJ. Malignant hyperthermia in pregnancy. *Am J Obstet Gynecol* 1984; **150**: 327–8
- 24 Fay RS, Gallant EM. Halothane sensitivity of young pigs *in vivo* and *in vitro*. *Am J Physiol* 1990; **259**: R133–8
- 25 Faust DK, Gergis SD, Sokoll MD. Management of suspected malignant hyperpyrexia in an infant. *Anesth Analg* 1979; **58**: 33–5
- 26 Gronert GA. Contracture responses and energy stores in quadriceps muscle from humans age 7–82 years. *Hum Biol* 1980; **52**: 43–51
- 27 Allen G, Rosenberg H. Diagnosis of malignant hyperthermia in infants [letter; comment]. *Anesth Analg* 1990; **70**: 115–6
- 28 Ording H, Ranklev E, Fletcher R. Investigation of malignant hyperthermia in Denmark and Sweden. *Br J Anaesth* 1984; **56**: 1183–90
- 29 MacLennan DH, Phillips MS. Malignant hyperthermia. *Science* 1992; **256**: 789–94

- 30** Lai FA, Erickson H, Block BA, Meissner G. Evidence for a junctional feet-ryanodine receptor complex from sarcoplasmic reticulum. *Biochem Biophys Res Commun* 1987; **143**: 704–9
- 31** Mickelson JR, Louis CF. Malignant hyperthermia: excitation-contraction coupling,  $\text{Ca}^{2+}$  release channel, and cell  $\text{Ca}^{2+}$  regulation defects. *Physiol Rev* 1996; **76**: 537–92
- 32** McCarthy TV, Healy JM, Heffron JJ, Lehane M, Deufel T, Lehmann-Horn F, *et al.* Localization of the malignant hyperthermia susceptibility locus to human chromosome 19q12-13.2. *Nature* 1990; **343**: 562–4
- 33** Ball SP, Johnson KJ. The genetics of malignant hyperthermia. *J Med Genet* 1993; **30**: 89–93
- 34** Levitt RC, Olckers A, Meyers S, Fletcher JE, Rosenberg H, Isaacs H, *et al.* Evidence for the localization of a malignant hyperthermia susceptibility locus (MHS2) to human chromosome 17q. *Genomics* 1992; **14**: 562–6
- 35** Iles DE, Lehmann-Horn F, Scherer SW, Tsui LC, Olde Weghuis D, Suijkerbuijk RF, *et al.* Localization of the gene encoding the alpha 2/delta-subunits of the L-type voltage-dependent calcium channel to chromosome 7q and analysis of the segregation of flanking markers in malignant hyperthermia susceptible families. *Hum Mol Genet* 1994; **3**: 969–75
- 36** Sudbrak R, Procaccio V, Klausnitzer M, Curran JL, Monsieurs K, van Broeckhoven C, *et al.* Mapping of a further malignant hyperthermia susceptibility locus to chromosome 3q13.1. *Am J Hum Genet* 1995; **56**: 684–91
- 37** Robinson RL, Monnier N, Wolz W, Jung M, Reis A, Nuernberg G, *et al.* A genome wide search for susceptibility loci in three European malignant hyperthermia pedigrees. *Hum Mol Genet* 1997; **6**: 953–61
- 38** Monnier N, Procaccio V, Stieglitz P, Lunardi J. Malignant-hyperthermia susceptibility is associated with a mutation of the alpha 1-subunit of the human dihydropyridine-sensitive L-type voltage-dependent calcium-channel receptor in skeletal muscle [see comments]. *Am J Hum Genet* 1997; **60**: 1316–25
- 39** Adeokun AM, West SP, Ellis FR, Halsall PJ, Hopkins PM, Foroughmand AM, *et al.* The G1021A substitution in the RYR1 gene does not cosegregate with malignant hyperthermia susceptibility in a British pedigree. *Am J Hum Genet* 1997; **60**: 833–41
- 40** Serfas KD, Bose D, Patel L, Wrogemann K, Phillips MS, MacLennan DH, *et al.* Comparison of the segregation of the RYR1 C1840T mutation with segregation of the caffeine/halothane contracture test results for malignant hyperthermia susceptibility in a large Manitoba Mennonite family [see comments]. *Anesthesiology* 1996; **84**: 322–9
- 41** Fagerlund TH, Ording H, Bendixen D, Islander G, Ranklev Twetman E, Berg K. Discordance between malignant hyperthermia susceptibility and RYR1 mutation C1840T in two Scandinavian MH families exhibiting this mutation. *Clin Genet* 1997; **52**: 416–21
